# Supplementary material for: Applying Socio-Ecological Perspective for Fostering Resilience in Rural Settlements—Melghat Region, India
Source: MDPI journal article supplement (doi:10.3390/su15031812), 2023-01-17
Supplement: s1 [file s1]

Archive with 2 entries (2 files):
- Supplementary Material A.pdf
- Supplementary Material B.pdf
