# Supplementary material for: Applying Socio-Ecological Perspective for Fostering Resilience in Rural Settlements—Melghat Region, India
Source: MDPI journal article supplement (doi:10.3390/su15031812), 2023-01-17
Supplement: s1 [file s1]

## Supplementary Material B

### 1. Ecosystem Services

Call: glm(formula = Choice ~ 0 + ES1 + ES2 + ES3 + ES4, family = binomial(link = "logit"), data = mydata)

Deviance Residuals:

| Min     | 1Q      | Median | 3Q     | Max    |
|---------|---------|--------|--------|--------|
| -1.8370 | -0.5738 | 0.3331 | 0.8316 | 1.9417 |

Coefficients: Estimate Std. Error z value Pr(>|z|)

|     |           |          |        |              |
|-----|-----------|----------|--------|--------------|
| ES1 | 0.152859  | 0.038884 | 3.931  | 8.45e-05 *** |
| ES2 | 0.043408  | 0.006324 | 6.864  | 6.69e-12 *** |
| ES3 | -0.004765 | 0.001291 | -3.693 | 0.000222 *** |
| ES4 | 0.320308  | 0.039051 | 8.202  | 2.36e-16 *** |

Signif. codes: 0 '\*\*\*' 0.001 '\*\*' 0.01 '\*' 0.05 '.' 0.1 ' ' 1

(Dispersion parameter for binomial family taken to be 1)

Null deviance: 417.27 on 301 degrees of freedom

Residual deviance: 282.21 on 297 degrees of freedom

AIC: 290.21

Number of Fisher Scoring iterations: 5

ODDS RATIO [exp(coefficients(result))]

| ES1       | ES2       | ES3       | ES4       |
|-----------|-----------|-----------|-----------|
| 1.1651607 | 1.0443634 | 0.9952459 | 1.3775521 |

## 2. Environmental Governance

Call: glm(formula = Choice ~ 0 + EG1 + EG2 + EG3 + EG4, family = binomial(link = "logit"), data = mydata)

Deviance Residuals:

| Min     | 1Q      | Median | 3Q     | Max    |
|---------|---------|--------|--------|--------|
| -2.1365 | -0.8492 | 0.5770 | 0.8976 | 1.5459 |

Coefficients: Estimate Std. Error z value Pr(>|z|)

|     |          |          |       |              |
|-----|----------|----------|-------|--------------|
| EG1 | 0.008740 | 0.002831 | 3.087 | 0.00202 **   |
| EG2 | 0.019148 | 0.004190 | 4.570 | 4.88e-06 *** |
| EG3 | 0.234766 | 0.031356 | 7.487 | 7.04e-14 *** |
| EG4 | 0.109675 | 0.021364 | 5.134 | 2.84e-07 *** |

Signif. codes: 0 '\*\*\*' 0.001 '\*\*' 0.01 '\*' 0.05 '.' 0.1 ' ' 1

(Dispersion parameter for binomial family taken to be 1)

Null deviance: 417.27 on 301 degrees of freedom

Residual deviance: 327.88 on 297 degrees of freedom

AIC: 335.88

Number of Fisher Scoring iterations: 4

ODDS RATIO [exp(coefficients(result))]

| EG1      | EG2      | EG3      | EG4      |
|----------|----------|----------|----------|
| 1.008778 | 1.019332 | 1.264612 | 1.115915 |

### 3. Socio-Cultural

|                                                                                                           |          |          |        |              |
|-----------------------------------------------------------------------------------------------------------|----------|----------|--------|--------------|
| Call: glm(formula = Choice ~ 0 + SC1 + SC2 + SC3 + SC4, family = binomial(link = "logit"), data = mydata) |          |          |        |              |
| Deviance Residuals:                                                                                       |          |          |        |              |
| Min                                                                                                       | 1Q       | Median   | 3Q     | Max          |
| -2.5648                                                                                                   | -0.5803  | 0.2378   | 0.5045 | 1.7983       |
| Coefficients: Estimate Std. Error z value Pr(> z )                                                        |          |          |        |              |
| SC1                                                                                                       | 0.524828 | 0.056848 | 9.232  | < 2e-16 ***  |
| SC2                                                                                                       | 0.018556 | 0.005564 | 3.335  | 0.000854 *** |
| SC3                                                                                                       | 0.003759 | 0.004945 | 0.760  | 0.447203     |
| SC4                                                                                                       | 0.030071 | 0.039562 | 0.760  | 0.447203     |
| Signif. codes: 0 '***' 0.001 '**' 0.01 '*' 0.05 '.' 0.1 ' ' 1                                             |          |          |        |              |
| (Dispersion parameter for binomial family taken to be 1)                                                  |          |          |        |              |
| Null deviance: 417.27 on 301 degrees of freedom                                                           |          |          |        |              |
| Residual deviance: 184.07 on 297 degrees of freedom                                                       |          |          |        |              |
| AIC: 192.07                                                                                               |          |          |        |              |
| Number of Fisher Scoring iterations: 6                                                                    |          |          |        |              |

ODDS RATIO [exp(coefficients(result))]

|          |          |          |          |
|----------|----------|----------|----------|
| SC1      | SC2      | SC3      | SC4      |
| 1.690168 | 1.018729 | 1.003766 | 1.030527 |

#### 4. Livelihoods

|                                                                                                           |           |          |        |              |
|-----------------------------------------------------------------------------------------------------------|-----------|----------|--------|--------------|
| Call: glm(formula = Choice ~ 0 + LV1 + LV2 + LV3 + LV4, family = binomial(link = "logit"), data = mydata) |           |          |        |              |
| Deviance Residuals:                                                                                       |           |          |        |              |
| Min                                                                                                       | 1Q        | Median   | 3Q     | Max          |
| -2.4142                                                                                                   | -0.7182   | 0.4857   | 0.8439 | 1.7212       |
| Coefficients: Estimate Std. Error z value Pr(> z )                                                        |           |          |        |              |
| LV1                                                                                                       | 0.475526  | 0.057105 | 8.327  | < 2e-16 ***  |
| LV2                                                                                                       | -0.019514 | 0.008017 | -2.434 | 0.01493 *    |
| LV3                                                                                                       | 0.028483  | 0.010776 | 2.643  | 0.00821 **   |
| LV4                                                                                                       | 0.204789  | 0.049683 | 4.122  | 3.76e-05 *** |
| Signif. codes: 0 '***' 0.001 '**' 0.01 '*' 0.05 '.' 0.1 ' ' 1                                             |           |          |        |              |
| (Dispersion parameter for binomial family taken to be 1)                                                  |           |          |        |              |
| Null deviance: 417.27 on 301 degrees of freedom                                                           |           |          |        |              |
| Residual deviance: 291.32 on 297 degrees of freedom                                                       |           |          |        |              |
| AIC: 299.32                                                                                               |           |          |        |              |
| Number of Fisher Scoring iterations: 4                                                                    |           |          |        |              |

ODDS RATIO [exp(coefficients(result))]

|           |           |           |           |
|-----------|-----------|-----------|-----------|
| LV1       | LV2       | LV3       | LV4       |
| 1.6088609 | 0.9806749 | 1.0288922 | 1.2272661 |

## 5. Natural Hazards

|                                                                                                           |          |          |         |         |
|-----------------------------------------------------------------------------------------------------------|----------|----------|---------|---------|
| Call: glm(formula = Choice ~ 0 + NH1 + NH2 + NH3 + NH4, family = binomial(link = "logit"), data = mydata) |          |          |         |         |
| Deviance Residuals:                                                                                       |          |          |         |         |
| Min                                                                                                       | 1Q       | Median   | 3Q      | Max     |
| -1.69410                                                                                                  | -0.95556 | 0.00007  | 0.73752 | 1.41680 |
| Coefficients: Estimate Std. Error z value Pr(> z )                                                        |          |          |         |         |
| NH1                                                                                                       | 0.06159  | 0.03235  | 1.904   | 0.057   |
| NH2                                                                                                       | 0.06159  | 0.03235  | 1.904   | 0.057   |
| NH3                                                                                                       | 0.24060  | 11.71536 | 0.021   | 0.984   |
| NH4                                                                                                       | -2.03426 | 93.72287 | -0.022  | 0.983   |
| Signif. codes: 0 '***' 0.001 '**' 0.01 '*' 0.05 '.' 0.1 ' ' 1                                             |          |          |         |         |
| (Dispersion parameter for binomial family taken to be 1)                                                  |          |          |         |         |
| Null deviance: 417.27 on 301 degrees of freedom                                                           |          |          |         |         |
| Residual deviance: 219.78 on 297 degrees of freedom                                                       |          |          |         |         |
| AIC: 227.78                                                                                               |          |          |         |         |
| Number of Fisher Scoring iterations: 18                                                                   |          |          |         |         |

ODDS RATIO [exp(coefficients(result))]

| NH1       | NH2       | NH3       | NH4       |
|-----------|-----------|-----------|-----------|
| 1.0635264 | 1.0635264 | 1.2720177 | 0.1307773 |

## 6. EESLN ( Comparing five Indicators)

|                                                                                                                                |          |          |         |              |
|--------------------------------------------------------------------------------------------------------------------------------|----------|----------|---------|--------------|
| Call: glm(formula = Choice ~ 0 + EESLN1 + EESLN2 + EESLN3 + EESLN4 + EESLN5, family = binomial(link = "logit"), data = mydata) |          |          |         |              |
| Deviance Residuals:                                                                                                            |          |          |         |              |
| Min                                                                                                                            | 1Q       | Median   | 3Q      | Max          |
| -2.02168                                                                                                                       | -0.34612 | -0.09248 | 0.56731 | 2.79063      |
| Coefficients: Estimate Std. Error z value Pr(> z )                                                                             |          |          |         |              |
| EESLN1                                                                                                                         | 0.032806 | 0.004378 | 7.493   | 6.74e-14 *** |
| EESLN2                                                                                                                         | 0.157920 | 0.025689 | 6.147   | 7.88e-10 *** |
| EESLN3                                                                                                                         | 0.009827 | 0.002458 | 3.997   | 6.41e-05 *** |
| EESLN4                                                                                                                         | 0.781639 | 0.064537 | 12.111  | < 2e-16 ***  |
| EESLN5                                                                                                                         | 0.045627 | 0.004554 | 10.018  | < 2e-16 ***  |
| Signif. codes: 0 '***' 0.001 '**' 0.01 '*' 0.05 '.' 0.1 ' ' 1                                                                  |          |          |         |              |
| (Dispersion parameter for binomial family taken to be 1)                                                                       |          |          |         |              |
| Null deviance: 894.16 on 645 degrees of freedom                                                                                |          |          |         |              |
| Residual deviance: 444.50 on 640 degrees of freedom                                                                            |          |          |         |              |
| AIC: 454.5                                                                                                                     |          |          |         |              |
| Number of Fisher Scoring iterations: 6                                                                                         |          |          |         |              |

ODDS RATIO [exp(coefficients(result))]

|          |          |          |          |          |
|----------|----------|----------|----------|----------|
| EESLN1   | EESLN2   | EESLN3   | EESLN4   | EESLN5   |
| 1.033351 | 1.171072 | 1.009876 | 2.185052 | 1.046684 |
