# Supplementary material for: Applying Socio-Ecological Perspective for Fostering Resilience in Rural Settlements—Melghat Region, India
Source: MDPI journal article supplement (doi:10.3390/su15031812), 2023-01-17
Supplement: s1 [file s1 › Supplementary Material A.pdf]

Questionnaire Survey for the Project Titled:

***"Socio-Ecological Resilience as a Sustainable Development Strategy under the Context of Emerging Disaster Risks for Rural Settlements in Different Geo-Climatic Zones of India"***

Name of Respondent: .....

Name of Village: .....

Date of exercise: .....

Project Coordinating Agency: ***Visvesvaraya National Institute of Technology, Nagpur***

Funded by: ***START International Inc., USA.***

## PART A

### I Personal Details

- 1) Gender Male/Female
- 2) Age group a) 18-29 b) 30-39 c) 40-49 d) 50-59 e) 60-69 f) 70 & above
- 3) Occupation a) Student b) salaried c) self employed d) unemployed e) retired
- 4) Level of education a) Primary b) higher secondary c) graduate d) post-graduate
- 5) Avg. family income (Rs. Per month) a) <5,000 b) 5,001-10,000 c) 10001- 20,000 d) 20,001- 30,000  
e) 30,001-40,000 f) 40,001- 50,000 g) >50,000
- 6) Number of household persons \_\_\_\_\_
- 7) Disabilities, if any a) Vision b) hearing c) physical
- 8) Since how long are you staying in this locality?  
a) 1- 5 yrs c) 6-10 yrs d) 11-20 yrs e) 21-30 yrs f) > 30 yrs

### II About property

- 1) What is your house occupancy status?  
a) tenant b) owner
- 2) How often do you have to repair the house?  
a) Once in a year b) once in two years c) once in 5 years d) never
- 3) Do you have the house insured against disasters?  
a) yes b) no

### III About transportation:

- 1) What vehicles do you own? (numbers)  
a) bicycle b) motorbike c) car d) none
- 2) What is the common mode of travel you use for following distances?  
a) 1-2 kms b) 3-5 kms c) 5-10 kms d) >10 kms

|         |                     |                 |
|---------|---------------------|-----------------|
| i) Walk | ii) Bicycle         | iii) Motorcycle |
| iv) Car | v) Public Transport |                 |

### IV About material possessions

- 1) Do you have access to following modes of information?  
a) Television b) telephone c) PC and internet d) radio
- 2) What are the other electrical gadgets you own?  
a) Air cooler b) air conditioner c) fan d) none
- 3) Do you have any cattle/ live stock?  
a) yes b) no

**PART B**

In the present situation how would you weigh the following assumptions? Weigh 1-10 according to significance, 10 being the highest significant.

| Assumption                                 | Relative Weight |
|--------------------------------------------|-----------------|
| 1. <b>Food Variety</b>                     |                 |
| 2. <b>Forest Produce &amp; Timber</b>      |                 |
| 3. <b>Landslide &amp; Flood Protection</b> |                 |
| 4. <b>Customs &amp; Rituals</b>            |                 |

There are 7 questions. Choose either A or B area in which you would prefer to live, from each of the seven questions.

| Q.1 | Food Variety    | Forest Produce & Timber   | Landslide & Flood Protection | Customs & Rituals               |
|-----|-----------------|---------------------------|------------------------------|---------------------------------|
| A   | >10 Food Groups | >80% population dependent | >10% population affected     | Closely integrated with nature  |
| B   | <6 Food Groups  | <50% population dependent | <10% population affected     | Somewhat integrated with nature |

| Q.2 | Food Variety    | Forest Produce & Timber   | Landslide & Flood Protection | Customs & Rituals               |
|-----|-----------------|---------------------------|------------------------------|---------------------------------|
| A   | >10 Food Groups | <50% population dependent | <10% population affected     | Closely integrated with nature  |
| B   | <6 Food Groups  | >80% population dependent | >10% population affected     | Somewhat integrated with nature |

| Q.3 | Food Variety    | Forest Produce & Timber   | Landslide & Flood Protection | Customs & Rituals               |
|-----|-----------------|---------------------------|------------------------------|---------------------------------|
| A   | <6 Food Groups  | >80% population dependent | <10% population affected     | Closely integrated with nature  |
| B   | >10 Food Groups | <50% population dependent | >10% population affected     | Somewhat integrated with nature |

| Q.4 | Food Variety    | Forest Produce & Timber   | Landslide & Flood Protection | Customs & Rituals               |
|-----|-----------------|---------------------------|------------------------------|---------------------------------|
| A   | >10 Food Groups | >80% population dependent | >10% population affected     | Somewhat integrated with nature |
| B   | <6 Food Groups  | <50% population dependent | <10% population affected     | Closely integrated with nature  |

| Q.5 | Food Variety    | Forest Produce & Timber   | Landslide & Flood Protection | Customs & Rituals               |
|-----|-----------------|---------------------------|------------------------------|---------------------------------|
| A   | >10 Food Groups | <50% population dependent | <10% population affected     | Somewhat integrated with nature |
| B   | <6 Food Groups  | >80% population dependent | >10% population affected     | Closely integrated with nature  |

| Q.6 | Food Variety    | Forest Produce & Timber   | Landslide & Flood Protection | Customs & Rituals               |
|-----|-----------------|---------------------------|------------------------------|---------------------------------|
| A   | >10 Food Groups | >80% population dependent | <10% population affected     | Somewhat integrated with nature |
| B   | <6 Food Groups  | <50% population dependent | >10% population affected     | Closely integrated with nature  |

| Q.7 | Food Variety    | Forest Produce & Timber   | Landslide & Flood Protection | Customs & Rituals               |
|-----|-----------------|---------------------------|------------------------------|---------------------------------|
| A   | <6 Food Groups  | >80% population dependent | <10% population affected     | Somewhat integrated with nature |
| B   | >10 Food Groups | <50% population dependent | >10% population affected     | Closely integrated with nature  |

In the present situation how would you weigh the following assumption? Weigh 1-10 according to significance, 10 being highest significant.

| Assumption                                                 | Relative Weight |
|------------------------------------------------------------|-----------------|
| 1. Ecosystem Knowledge & Training                          |                 |
| 2. Participatory Governance                                |                 |
| 3. Active engagement in Ecological Conservation            |                 |
| 4. Monitory provisions for ecological conservation and DRR |                 |

There are 7 questions. Choose either A or B area in which you would prefer to live, from each of the seven questions.

| Q.1 | Ecosystem Knowledge              | Participatory Governance          | Ecological Conservation                 | Monitory Provisions |
|-----|----------------------------------|-----------------------------------|-----------------------------------------|---------------------|
| A   | >75% regional biodiversity known | >75% population attend Gram Sabha | <15% population participate proactively | >10% revenue        |
| B   | <25% regional biodiversity known | <40% population attend Gram Sabha | >20% population participate proactively | <10% revenue        |

| Q.2 | Ecosystem Knowledge              | Participatory Governance          | Ecological Conservation                 | Monitory Provisions |
|-----|----------------------------------|-----------------------------------|-----------------------------------------|---------------------|
| A   | >75% regional biodiversity known | <40% population attend Gram Sabha | >20% population participate proactively | >10% revenue        |
| B   | <25% regional biodiversity known | >75% population attend Gram Sabha | <15% population participate proactively | <10% revenue        |

| Q. 3 | Ecosystem Knowledge              | Participatory Governance          | Ecological Conservation                 | Monitory Provisions |
|------|----------------------------------|-----------------------------------|-----------------------------------------|---------------------|
| A    | <25% regional biodiversity known | >75% population attend Gram Sabha | >20% population participate proactively | >10% revenue        |
| B    | >75% regional biodiversity known | <40% population attend Gram Sabha | <15% population participate proactively | <10% revenue        |

| Q.4 | Ecosystem Knowledge              | Participatory Governance          | Ecological Conservation                 | Monitory Provisions |
|-----|----------------------------------|-----------------------------------|-----------------------------------------|---------------------|
| A   | >75% regional biodiversity known | >75% population attend Gram Sabha | <15% population participate proactively | <10% revenue        |
| B   | <25% regional biodiversity known | <40% population attend Gram Sabha | >20% population participate proactively | >10% revenue        |

| Q.5 | Ecosystem Knowledge              | Participatory Governance          | Ecological Conservation                 | Monitory Provisions |
|-----|----------------------------------|-----------------------------------|-----------------------------------------|---------------------|
| A   | >75% regional biodiversity known | <40% population attend Gram Sabha | >20% population participate proactively | <10% revenue        |
| B   | <25% regional biodiversity known | >75% population attend Gram Sabha | <15% population participate proactively | >10% revenue        |

| Q.6 | Ecosystem Knowledge              | Participatory Governance          | Ecological Conservation                 | Monitory Provisions |
|-----|----------------------------------|-----------------------------------|-----------------------------------------|---------------------|
| A   | >75% regional biodiversity known | >75% population attend Gram Sabha | >20% population participate proactively | <10% revenue        |
| B   | <25% regional biodiversity known | <40% population attend Gram Sabha | <15% population participate proactively | >10% revenue        |

| Q. 7 | Ecosystem Knowledge              | Participatory Governance          | Ecological Conservation                 | Monitory Provisions |
|------|----------------------------------|-----------------------------------|-----------------------------------------|---------------------|
| A    | <25% regional biodiversity known | >75% population attend Gram Sabha | >20% population participate proactively | <10% revenue        |
| B    | >75% regional biodiversity known | <40% population attend Gram Sabha | <15% population participate proactively | >10% revenue        |

In the present situation how would you weigh the following assumptions? Weigh 1-10 according to significance, 10 being the highest significant.

| Assumption                                                | Relative Weight |
|-----------------------------------------------------------|-----------------|
| 1. Ethics & norms for resource conservation               |                 |
| 2. Continuity of traditional knowledge systems            |                 |
| 3. Climate Adaptive lifestyle                             |                 |
| 4. Recognition for innovations in adaptation & mitigation |                 |

There are 7 questions. Choose either A or B area in which you would prefer to live, from each of the seven questions.

| Q. 1 | Ethics & Norms       | Continuity of TKS | Adaptive style | Life       | Recognition for Innovation |
|------|----------------------|-------------------|----------------|------------|----------------------------|
| A    | Stringently followed | >60% TKS followed | <40% housing   | vernacular | Recognized with award      |
| B    | Loosely followed     | <10% TKS followed | >80% housing   | vernacular | Poor recognition           |

| Q.2 | Ethics & Norms       | Continuity of TKS | Adaptive style | Life       | Recognition for Innovation |
|-----|----------------------|-------------------|----------------|------------|----------------------------|
| A   | Stringently followed | <10% TKS followed | >80% housing   | vernacular | Recognized with award      |
| B   | Loosely followed     | >60% TKS followed | <40% housing   | vernacular | Poor recognition           |

| Q.3 | Ethics & Norms       | Continuity of TKS | Adaptive style | Life       | Recognition for Innovation |
|-----|----------------------|-------------------|----------------|------------|----------------------------|
| A   | Loosely followed     | >60% TKS followed | >80% housing   | vernacular | Recognized with award      |
| B   | Stringently followed | <10% TKS followed | <40% housing   | vernacular | Poor recognition           |

| Q.4 | Ethics & Norms       | Continuity of TKS | Adaptive style | Life       | Recognition for Innovation |
|-----|----------------------|-------------------|----------------|------------|----------------------------|
| A   | Stringently followed | >60% TKS followed | <40% housing   | vernacular | Poor recognition           |
| B   | Loosely followed     | <10% TKS followed | >80% housing   | vernacular | Recognized with award      |

| Q.5 | Ethics & Norms       | Continuity of TKS | Adaptive style | Life       | Recognition for Innovation |
|-----|----------------------|-------------------|----------------|------------|----------------------------|
| A   | Stringently followed | <10% TKS followed | >80% housing   | vernacular | Poor recognition           |
| B   | Loosely followed     | >60% TKS followed | <40% housing   | vernacular | Recognized with award      |

| Q.6 | Ethics & Norms       | Continuity of TKS | Adaptive style | Life       | Recognition for Innovation |
|-----|----------------------|-------------------|----------------|------------|----------------------------|
| A   | Stringently followed | >60% TKS followed | >80% housing   | vernacular | Poor recognition           |
| B   | Loosely followed     | <10% TKS followed | <40% housing   | vernacular | Recognized with award      |

| Q. 7 | Ethics & Norms       | Continuity of TKS | Adaptive style | Life       | Recognition for Innovation |
|------|----------------------|-------------------|----------------|------------|----------------------------|
| A    | Loosely followed     | >60% TKS followed | >80% housing   | vernacular | Poor recognition           |
| B    | Stringently followed | <10% TKS followed | <40% housing   | vernacular | Recognized with award      |

In the present situation how would you weigh the following assumptions? Weigh 1-10 according to significance, 10 being the highest significant.

| Assumption                                      | Relative Weight |
|-------------------------------------------------|-----------------|
| 1. Availability of alternative income source    |                 |
| 2. Distance from livelihood supporting services |                 |
| 3. Access to financial institutions             |                 |
| 4. Training and development                     |                 |

There are 7 questions. Choose either A or B area in which you would prefer to live, from each of the seven questions.

| Q. 1 | Alternative source | Supporting services | Access to financial institutions | Training and development       |
|------|--------------------|---------------------|----------------------------------|--------------------------------|
| A    | ≥3 options         | <10 kms             | <5% population have access       | >5 programs conducted annually |
| B    | <3 options         | >30 kms             | >20% population have access      | <2 programs conducted annually |

| Q. 2 | Alternative source | Supporting services | Access to financial institutions | Training and development       |
|------|--------------------|---------------------|----------------------------------|--------------------------------|
| A    | ≥3 options         | >30 kms             | >20% population have access      | >5 programs conducted annually |
| B    | <3 options         | <10 kms             | <5% population have access       | <2 programs conducted annually |

| Q. 3 | Alternative source | Supporting services | Access to financial institutions | Training and development       |
|------|--------------------|---------------------|----------------------------------|--------------------------------|
| A    | <3 options         | <10 kms             | >20% population have access      | >5 programs conducted annually |
| B    | ≥3 options         | >30 kms             | <5% population have access       | <2 programs conducted annually |

| Q. 4 | Alternative source | Supporting services | Access to financial institutions | Training and development       |
|------|--------------------|---------------------|----------------------------------|--------------------------------|
| A    | ≥3 options         | <10 kms             | <5% population have access       | <2 programs conducted annually |
| B    | <3 options         | >30 kms             | >20% population have access      | >5 programs conducted annually |

| Q. 5 | Alternative source | Supporting services | Access to financial institutions | Training and development       |
|------|--------------------|---------------------|----------------------------------|--------------------------------|
| A    | ≥3 options         | >30 kms             | >20% population have access      | <2 programs conducted annually |
| B    | <3 options         | <10 kms             | <5% population have access       | >5 programs conducted annually |

| Q. 6 | Alternative source | Supporting services | Access to financial institutions | Training and development       |
|------|--------------------|---------------------|----------------------------------|--------------------------------|
| A    | ≥3 options         | <10 kms             | >20% population have access      | >5 programs conducted annually |
| B    | <3 options         | >30 kms             | <5% population have access       | <2 programs conducted annually |

| Q. 7 | Alternative source | Supporting services | Access to financial institutions | Training and development       |
|------|--------------------|---------------------|----------------------------------|--------------------------------|
| A    | <3 options         | <10 kms             | >20% population have access      | <2 programs conducted annually |
| B    | ≥3 options         | >30 kms             | <5% population have access       | >5 programs conducted annually |

In the present situation how would you weigh the following assumptions? Weigh 1-10 according to significance, 10 being the highest significant.

| Assumption                                                            | Relative Weight |
|-----------------------------------------------------------------------|-----------------|
| 1. Early warning systems                                              |                 |
| 2. Integration of hazard map in planning                              |                 |
| 3. Adaptive measures and coping mechanisms against natural calamities |                 |
| 4. Response mechanism and community capacity                          |                 |

There are 7 questions. Choose either A or B area in which you would prefer to live, from each of the seven questions.

| Q. 1 | Early warning systems       | Integration of hazard map     | Coping mechanisms | Response mechanism       |
|------|-----------------------------|-------------------------------|-------------------|--------------------------|
| A    | Risks communicated monthly  | Hazard map updated annually   | <50% practiced    | <5% population affected  |
| B    | Risks communicated annually | Hazard map updated in 5 years | >90% practiced    | >10% population affected |

| Q. 2 | Early warning systems       | Integration of hazard map     | Coping mechanisms | Response mechanism       |
|------|-----------------------------|-------------------------------|-------------------|--------------------------|
| A    | Risks communicated monthly  | Hazard map updated in 5 years | >90% practiced    | <5% population affected  |
| B    | Risks communicated annually | Hazard map updated annually   | <50% practiced    | >10% population affected |

| Q. 3 | Early warning systems       | Integration of hazard map     | Coping mechanisms | Response mechanism       |
|------|-----------------------------|-------------------------------|-------------------|--------------------------|
| A    | Risks communicated annually | Hazard map updated annually   | >90% practiced    | <5% population affected  |
| B    | Risks communicated monthly  | Hazard map updated in 5 years | <50% practiced    | >10% population affected |

| Q. 4 | Early warning systems       | Integration of hazard map     | Coping mechanisms | Response mechanism       |
|------|-----------------------------|-------------------------------|-------------------|--------------------------|
| A    | Risks communicated monthly  | Hazard map updated annually   | <50% practiced    | >10% population affected |
| B    | Risks communicated annually | Hazard map updated in 5 years | >90% practiced    | <5% population affected  |

| Q. 5 | Early warning systems       | Integration of hazard map     | Coping mechanisms | Response mechanism       |
|------|-----------------------------|-------------------------------|-------------------|--------------------------|
| A    | Risks communicated monthly  | Hazard map updated in 5 years | >90% practiced    | >10% population affected |
| B    | Risks communicated annually | Hazard map updated annually   | <50% practiced    | <5% population affected  |

| Q. 6 | Early warning systems       | Integration of hazard map     | Coping mechanisms | Response mechanism       |
|------|-----------------------------|-------------------------------|-------------------|--------------------------|
| A    | Risks communicated monthly  | Hazard map updated annually   | >90% practiced    | >10% population affected |
| B    | Risks communicated annually | Hazard map updated in 5 years | <50% practiced    | <5% population affected  |

| Q. 7 | Early warning systems       | Integration of hazard map     | Coping mechanisms | Response mechanism       |
|------|-----------------------------|-------------------------------|-------------------|--------------------------|
| A    | Risks communicated annually | Hazard map updated annually   | >90% practiced    | >10% population affected |
| B    | Risks communicated monthly  | Hazard map updated in 5 years | <50% practiced    | <5% population affected  |

In the present situation how would you weigh the following assumptions? Weigh 1-10 according to significance, 10 being the highest significant.

| Assumption                            | Relative Weight |
|---------------------------------------|-----------------|
| 1. <b>Forest Produce &amp; Timber</b> |                 |
| 2. <b>Ecological Conservation</b>     |                 |
| 3. <b>Continuity of TKS</b>           |                 |
| 4. <b>Alternative source</b>          |                 |
| 5. <b>Coping mechanisms</b>           |                 |

There are 15 questions. Choose either A or B area in which you would prefer to live, from each of the seven questions.

| Q.1 | Forest Produce & Timber   | Ecological Conservation                 | Continuity of TKS | Alternative source | Coping mechanisms |
|-----|---------------------------|-----------------------------------------|-------------------|--------------------|-------------------|
| A   | <50% population dependent | <15% population participate proactively | >60% TKS followed | <3 options         | <50% practiced    |
| B   | >80% population dependent | >20% population participate proactively | <10% TKS followed | ≥3 options         | >90% practiced    |

| Q.2 | Forest Produce & Timber   | Ecological Conservation                 | Continuity of TKS | Alternative source | Coping mechanisms |
|-----|---------------------------|-----------------------------------------|-------------------|--------------------|-------------------|
| A   | >80% population dependent | <15% population participate proactively | >60% TKS followed | ≥3 options         | >90% practiced    |
| B   | <50% population dependent | >20% population participate proactively | <10% TKS followed | <3 options         | <50% practiced    |

| Q.3 | Forest Produce & Timber   | Ecological Conservation                 | Continuity of TKS | Alternative source | Coping mechanisms |
|-----|---------------------------|-----------------------------------------|-------------------|--------------------|-------------------|
| A   | <50% population dependent | <15% population participate proactively | <10% TKS followed | <3 options         | >90% practiced    |
| B   | >80% population dependent | >20% population participate proactively | >60% TKS followed | ≥3 options         | <50% practiced    |

| Q.4 | Forest Produce & Timber   | Ecological Conservation                 | Continuity of TKS | Alternative source | Coping mechanisms |
|-----|---------------------------|-----------------------------------------|-------------------|--------------------|-------------------|
| A   | <50% population dependent | >20% population participate proactively | <10% TKS followed | ≥3 options         | <50% practiced    |
| B   | >80% population dependent | <15% population participate proactively | >60% TKS followed | <3 options         | >90% practiced    |

| Q.5 | Forest Produce & Timber   | Ecological Conservation                 | Continuity of TKS | Alternative source | Coping mechanisms |
|-----|---------------------------|-----------------------------------------|-------------------|--------------------|-------------------|
| A   | >80% population dependent | >20% population participate proactively | >60% TKS followed | <3 options         | >90% practiced    |
| B   | <50% population dependent | <15% population participate proactively | <10% TKS followed | ≥3 options         | <50% practiced    |

| Q.6 | Forest Produce & Timber   | Ecological Conservation                 | Continuity of TKS | Alternative source | Coping mechanisms |
|-----|---------------------------|-----------------------------------------|-------------------|--------------------|-------------------|
| A   | >80% population dependent | <15% population participate proactively | >60% TKS followed | ≥3 options         | <50% practiced    |
| B   | <50% population dependent | >20% population participate proactively | <10% TKS followed | <3 options         | >90% practiced    |

| <b>Q.07</b> | <b>Forest Produce &amp; Timber</b> | <b>Ecological Conservation</b>          | <b>Continuity of TKS</b> | <b>Alternative source</b> | <b>Coping mechanisms</b> |
|-------------|------------------------------------|-----------------------------------------|--------------------------|---------------------------|--------------------------|
| A           | <50% population dependent          | >20% population participate proactively | >60% TKS followed        | ≥3 options                | >90% practiced           |
| B           | >80% population dependent          | <15% population participate proactively | <10% TKS followed        | <3 options                | <50% practiced           |

| <b>Q.08</b> | <b>Forest Produce &amp; Timber</b> | <b>Ecological Conservation</b>          | <b>Continuity of TKS</b> | <b>Alternative source</b> | <b>Coping mechanisms</b> |
|-------------|------------------------------------|-----------------------------------------|--------------------------|---------------------------|--------------------------|
| A           | >80% population dependent          | >20% population participate proactively | <10% TKS followed        | <3 options                | <50% practiced           |
| B           | <50% population dependent          | <15% population participate proactively | >60% TKS followed        | ≥3 options                | >90% practiced           |

| <b>Q.09</b> | <b>Forest Produce &amp; Timber</b> | <b>Ecological Conservation</b>          | <b>Continuity of TKS</b> | <b>Alternative source</b> | <b>Coping mechanisms</b> |
|-------------|------------------------------------|-----------------------------------------|--------------------------|---------------------------|--------------------------|
| A           | <50% population dependent          | <15% population participate proactively | <10% TKS followed        | ≥3 options                | >90% practiced           |
| B           | >80% population dependent          | >20% population participate proactively | >60% TKS followed        | <3 options                | <50% practiced           |

| <b>Q.10</b> | <b>Forest Produce &amp; Timber</b> | <b>Ecological Conservation</b>          | <b>Continuity of TKS</b> | <b>Alternative source</b> | <b>Coping mechanisms</b> |
|-------------|------------------------------------|-----------------------------------------|--------------------------|---------------------------|--------------------------|
| A           | <50% population dependent          | >20% population participate proactively | >60% TKS followed        | ≥3 options                | <50% practiced           |
| B           | >80% population dependent          | <15% population participate proactively | <10% TKS followed        | <3 options                | >90% practiced           |

| <b>Q.11</b> | <b>Forest Produce &amp; Timber</b> | <b>Ecological Conservation</b>          | <b>Continuity of TKS</b> | <b>Alternative source</b> | <b>Coping mechanisms</b> |
|-------------|------------------------------------|-----------------------------------------|--------------------------|---------------------------|--------------------------|
| A           | >80% population dependent          | <15% population participate proactively | <10% TKS followed        | ≥3 options                | <50% practiced           |
| B           | <50% population dependent          | >20% population participate proactively | >60% TKS followed        | <3 options                | >90% practiced           |

| <b>Q.12</b> | <b>Forest Produce &amp; Timber</b> | <b>Ecological Conservation</b>          | <b>Continuity of TKS</b> | <b>Alternative source</b> | <b>Coping mechanisms</b> |
|-------------|------------------------------------|-----------------------------------------|--------------------------|---------------------------|--------------------------|
| A           | <50% population dependent          | <15% population participate proactively | >60% TKS followed        | ≥3 options                | <50% practiced           |
| B           | >80% population dependent          | >20% population participate proactively | <10% TKS followed        | <3 options                | >90% practiced           |

| <b>Q.13</b> | <b>Forest Produce &amp; Timber</b> | <b>Ecological Conservation</b>          | <b>Continuity of TKS</b> | <b>Alternative source</b> | <b>Coping mechanisms</b> |
|-------------|------------------------------------|-----------------------------------------|--------------------------|---------------------------|--------------------------|
| A           | <50% population dependent          | >20% population participate proactively | >60% TKS followed        | <3 options                | <50% practiced           |
| B           | >80% population dependent          | <15% population participate proactively | <10% TKS followed        | ≥3 options                | >90% practiced           |

| <b>Q.14</b> | <b>Forest Produce &amp; Timber</b> | <b>Ecological Conservation</b>          | <b>Continuity of TKS</b> | <b>Alternative source</b> | <b>Coping mechanisms</b> |
|-------------|------------------------------------|-----------------------------------------|--------------------------|---------------------------|--------------------------|
| A           | >80% population dependent          | <15% population participate proactively | >60% TKS followed        | <3 options 0              | <50% practiced           |
| B           | <50% population dependent          | >20% population participate proactively | <10% TKS followed        | ≥3 options                | >90% practiced           |

| <b>Q.15</b> | <b>Forest Produce &amp; Timber</b> | <b>Ecological Conservation</b>          | <b>Continuity of TKS</b> | <b>Alternative source</b> | <b>Coping mechanisms</b> |
|-------------|------------------------------------|-----------------------------------------|--------------------------|---------------------------|--------------------------|
| A           | <50% population dependent          | <15% population participate proactively | >60% TKS followed        | <3 options                | >90% practiced           |
| B           | >80% population dependent          | >20% population participate proactively | <10% TKS followed        | ≥3 options                | <50% practiced           |
